1 TITLE PAGE

2 Progression / remission of Coronavirus disease 2019: Data driven recommendations for repeating SARS-  
3 CoV-2 nucleic acid amplification tests

4

5 Kaitlyn Williams\*, Reed Idriss, MD<sup>□</sup>; Jessica Dodge, MD\*; Samuel Barasch, MD\*

6

7 \*Pathology and Laboratory Medicine, Danbury Hospital, Nuvance Health, Danbury, CT, USA

8 <sup>□</sup>Department of Emergency Medicine, Danbury Hospital, Nuvance Health, Danbury, CT, USA

9

10

11 Running Head: Recommendations for repeating SARS-CoV-2 NAA testing

12

13

14 Address correspondence to

15 Samuel Barasch, [Samuel.Barasch@wchn.org](mailto:Samuel.Barasch@wchn.org)

16 24 Hospital Ave. Laboratory, 2 tower

17 Danbury, CT 06810, USA

18

19 Word count: 1,356 words

20 **ABSTRACT**

21 **Aims**

22 This short study was performed to better understand the time frame associated with changes in SARS-  
23 CoV-2 nucleic acid testing and provide recommendations for repeat testing. Recommendations were  
24 useful as little guidance is available for repeat testing in patients being followed expectantly for changes  
25 in disease.

26 **Methods**

27 A review of laboratory data of tests for SARS-CoV-2 nucleic acid was performed selecting patients who  
28 had changing results. Time between changes in test results was determined to provide guidance for  
29 repeat testing.

30 **Results**

31 The interquartile range of data for patients who had a negative to positive change in lab testing  
32 ("progression") was 6-16 days (Median 9). The interquartile range of data for patients who had a  
33 positive to negative change in test results ("remission") was 9-21 days (Median 14).

34 **Conclusion**

35 Because sampling of the nares or nasopharynx can be variable, repeat testing should be performed  
36 swiftly when symptomatic patients are negative. The data in this short study varies widely, so authors  
37 recommend repeat testing during a period of time associated with the interquartile range or median  
38 (see results above).

39 **TITLE**

40 Progression / remission of Coronavirus disease 2019: Data driven recommendations for repeating SARS-  
41 CoV-2 nucleic acid amplification tests

42 **INTRODUCTION**

43 Laboratory testing for Coronavirus disease 2019 (COVID-19) has taken a prominent position in the SARS-  
44 CoV-2 pandemic, and nucleic acid testing has been negative in some symptomatic patients<sup>1</sup> and positive  
45 in some patients who are asymptomatic.<sup>1-3</sup> Results which are discordant from the clinical picture are  
46 likely due to a combination of several factors including the following: viral prodromal/incubation  
47 period<sup>1,4,5</sup>, sampling discordance from different swabbing techniques and clinical abilities<sup>6</sup>, analytical  
48 differences between nucleic acid detection / instruments/methods or other technical analytical  
49 complications<sup>6,7</sup>, and changes in patient disease state<sup>1,2</sup>. Given that analytical sensitivity is high with  
50 nucleic acid amplification (testing methodology available early in the pandemic), clinical and biological  
51 factors such as appropriate specimen collection technique, progression of disease, and regression of  
52 disease can contribute to changes in values for the diagnostic nucleic amplification for SARS-CoV-2. This  
53 study was undertaken to assess prevalence of laboratory data changes in SARS-CoV-2 nucleic acid  
54 amplification tests, as well as time frames associated with these changes. Findings could guide testing  
55 for progression or remission of disease and may contribute to biological knowledge of the disease.

56

57

58 **METHODS**

59 This study was reviewed by our institutional review board and received exempt determination. The  
60 laboratory information system was searched for SARS-CoV-2 nucleic acid amplification tests in inpatients  
61 and outpatients associated with Western Connecticut Health Network (WCHN) hospitals (Danbury, CT;  
62 Norwalk, CT; New Milford, CT) through testing performed at WCHN laboratories, Connecticut

63 Department of Public Health Laboratory, and Reference Laboratories between 3/1/2020 and  
64 4/19/2020. All tests were based upon presence of nucleic acid for SARS-CoV-2 in the patient  
65 nasopharynx or nasal cavity. Testing laboratory, test manufacturer, and viral gene targets include the  
66 following: WCHN, Abbott ID NOW™, RdRP gene; Connecticut Department of Public Health Laboratory,  
67 CDC primers, N1/N2/N3 genes; Sunrise Medical Laboratories, Roche Cobas 6800/8800, ORF1 and E  
68 genes.<sup>8-10</sup> For testing performed on site at hospitals, testing was performed according to manufacturer  
69 specifications. Prior to 4/6/2020, all samples were collected via nasopharyngeal swabs or nasal swabs  
70 and stored/transported to testing facilities in Universal Transport Media (UTM). Beginning on 4/6/2020,  
71 nasal swabs without UTM were tested on Abbott ID NOW™ analyzers. Each test was performed on a  
72 separate sample. Patients with duplicate testing were identified. From the group of patients with  
73 duplicate testing, a group of patients with discordant results was identified. Result verified date was  
74 used to assign chronology. Number of days between discordant results was determined. Patients  
75 changing from a negative to positive result were classified as “progression” while patients changing from  
76 positive to negative were classified as “remission.” “Progression” and “Remission” in this study refer to  
77 newly appearing positive results or newly appearing negative results. In this context, the terms  
78 “progression” and “remission” imply a change of laboratory testing from negative to positive or positive  
79 to negative. The number of days between the first positive or negative result and the first discordant  
80 result was recorded as the number of days to progression or remission. Patients with same day results  
81 which were discordant were recorded as 0 days between progression or remission. Figure 1 histogram  
82 was created with Microsoft Excel. R 4.0.0 was used to generate scatterplots and boxplots and statistical  
83 analysis.

84

85 **RESULTS**

86 Table 1: Summary of results

|                                                                                 |                                                                                                  |
|---------------------------------------------------------------------------------|--------------------------------------------------------------------------------------------------|
| Number of nucleic acid amplification tests for SARS-CoV-2 in study time period  | 13,206                                                                                           |
| Number of patients tested                                                       | 12,360                                                                                           |
| Number of patients with more than one test                                      | 709                                                                                              |
| Number of patients with more than one test and no changes in test results       | 591                                                                                              |
| Number of patients with a change in test result                                 | 118                                                                                              |
| Number (percentage) of patients with a change in test result on 1 or 2 or tests | 89 (75%) – patients with change after 1 test.<br>110 (93%) – patients with change after 2 tests. |
| Number of patients with Progression (change from negative to positive)          | 65                                                                                               |
| Number of patients with Regression (change from positive to negative)           | 53                                                                                               |
| Interquartile range (Median) Progression                                        | 6-16 days (9 days)                                                                               |
| Interquartile range (Median) Regression                                         | 9-21 days (14 days)                                                                              |

87

88 13,206 nucleic acid amplification tests were performed and resulted in the study time period. Most  
89 laboratory result dates were between 0 and 2 days following the order date with order date being  
90 shortly before date and time of specimen collection. The total number of tests represented 12,360  
91 patients tested. 591 patients had 688 duplicate tests which were concordant. 118 patients had 158  
92 discordant duplicate SARS-CoV-2 tests. 65 patients with discordant tests were classified as  
93 “progression” while 53 patients with discordant tests were classified as “regression”. 3 patients had 0  
94 days to progression and 1 patient had 0 days to remission. Most patients with change in laboratory  
95 values had a change after 1 test (Figure 1). For patients with “progression” the mean number of days  
96 was 10.4 (10.9 excluding days to progression of 0) and the median was 9 (Figure 2). For patients with  
97 “remission” the mean was 13.5 days (13.7 excluding days to remission of 0) and median was 14 days  
98 (Figure 3).

99

100 **CONCLUSION**

101 Recent guidance from the Centers for Disease Control and Prevention (CDC) has been released regarding  
102 a Symptom-Based Strategy to Discontinue Isolation for Persons with COVID-19.<sup>11</sup> While the Symptom-  
103 Based strategy is appropriate for many patients, interim guidance from the CDC includes options for  
104 discontinuing isolation precautions for asymptomatic test-positive patients are divided into two  
105 different strategies, time-based and test-based. Isolation times for patients who have never had any  
106 symptoms using the time-based strategy require 10 days since the positive test. With the test-based  
107 strategy, asymptomatic carriers can be cleared from isolation with *two negative tests from different*  
108 *samples which are more than 24 hours apart* (see CDC guidance for details).<sup>12</sup> These recommendations  
109 highlight both the variability in viral shedding and sampling errors possible in affecting testing results.

110 In our study, same day repeat testing was a small proportion of patients who had a change in test results  
111 (0 days to progression/remission). These few patients were likely due to differences in nasopharyngeal  
112 swabbing technique rather than progression from a carrier state or remission of viral production in  
113 recovering patients. It is likely that some of the patients with change in lab results in the 1-2 day time  
114 frame may also represent a change in test results due to nasopharyngeal swabbing technique. Repeat  
115 sample collection with nasal/nasopharyngeal swab in a brief window of time is recommended to  
116 confirm a negative test.<sup>4,13</sup> Little information is available regarding false positive test results which could  
117 confound an early carrier/incubation/low symptom/convalescent carrier period in which patients lack  
118 symptoms and test positive.<sup>14</sup> However, divergent coronavirus strains or phylogenetically similar viral  
119 genomes could be involved in a repeated positive test in the absence of symptoms.<sup>6,13</sup> Presence of viral  
120 nucleic acid long after viral cultures can be recovered (i.e., culture serves as an in vitro indication of in  
121 vivo organism viability) has been demonstrated and could be contributing to difficulties clearing patients  
122 from isolation with a nucleic acid test-based strategy.<sup>15,16</sup>

123 Although knowledge about viral incubation times is rapidly evolving and many studies have highly varied  
124 results, the data collected here is concordant with what is currently known about viral incubation times  
125 and post-recovery carriage times. The “progression” data collected in this study overlaps with studies  
126 which show viral incubation time of between 2 and 14 days.<sup>1,2,6,14,17</sup> The “remission” data collected in  
127 this study likewise suggests a carriage time following resolution of symptoms which extends for several  
128 weeks.<sup>1,15,16</sup>

129 The data presented here represents both clinical variability of sample collection as well as biological  
130 behavior of SARS-CoV-2 through the window of changes in laboratory testing. However, some  
131 recommendations on repeat testing can be made. For patients with high clinical suspicion and test  
132 results which are divergent from the clinical picture, swift repeat testing is recommended.<sup>6,13</sup> If repeat  
133 testing is confirmatory, and an additional repeat test is required by the clinical circumstances, repeat  
134 testing after a period of time within the interquartile ranges of collected data, such as the median  
135 (Figures 2,3) should be considered. Therefore, testing for progression following a repeat negative is  
136 recommended at 9 days (or between 6 and 16 days) and testing for remission following a repeat positive  
137 is recommended at 14 days (or between 9 and 21 days).

138 In conclusion, although some guidance can be drawn from this data for repeat testing, this study does  
139 not control for sampling of the nares, testing methodology, patient disease state, or time of sampling.  
140 Long term follow-up on a broader window of patients is not available at the time of writing this and  
141 would give a more accurate time frame for repeat testing. Additionally, correlation with serologic  
142 testing could give this data both additional validity for recommending testing times and a deeper  
143 understanding of disease and immunologic dynamics. Finally, clinical details surrounding the repeat  
144 testing are unavailable to the authors and would give a more thorough understanding of effective  
145 utilization of testing for SARS-CoV-2.

146 REFERENCES

- 147 1. Young BE, Ong SWX, Kalimuddin S, et al. Epidemiologic Features and Clinical Course of Patients  
148 Infected With SARS-CoV-2 in Singapore. *Jama*. 2020.
- 149 2. Mizumoto K, Kagaya K, Zarebski A, Chowell G. Estimating the asymptomatic proportion of  
150 coronavirus disease 2019 (COVID-19) cases on board the Diamond Princess cruise ship,  
151 Yokohama, Japan, 2020. *Euro Surveill*. 2020;25(10).
- 152 3. Arons MM, Hatfield KM, Reddy SC, et al. Presymptomatic SARS-CoV-2 Infections and  
153 Transmission in a Skilled Nursing Facility. *N Engl J Med*. 2020.
- 154 4. Pan Y, Zhang D, Yang P, Poon LLM, Wang Q. Viral load of SARS-CoV-2 in clinical samples. *Lancet*  
155 *Infect Dis*. 2020;20(4):411-412.
- 156 5. Wei WE, Li Z, Chiew CJ, Yong SE, Toh MP, Lee VJ. Presymptomatic Transmission of SARS-CoV-2 -  
157 Singapore, January 23-March 16, 2020. *MMWR Morb Mortal Wkly Rep*. 2020;69(14):411-415.
- 158 6. Lippi G, Simundic AM, Plebani M. Potential preanalytical and analytical vulnerabilities in the  
159 laboratory diagnosis of coronavirus disease 2019 (COVID-19). *Clin Chem Lab Med*. 2020.
- 160 7. Study Raises Questions About False Negatives From Quick COVID-19 Test. NPR.  
161 [https://www.npr.org/sections/health-shots/2020/04/21/838794281/study-raises-questions-](https://www.npr.org/sections/health-shots/2020/04/21/838794281/study-raises-questions-about-false-negatives-from-quick-covid-19-test)  
162 [about-false-negatives-from-quick-covid-19-test](https://www.npr.org/sections/health-shots/2020/04/21/838794281/study-raises-questions-about-false-negatives-from-quick-covid-19-test). Published 2020. Accessed.
- 163 8. Laboratories A. ID NOW COVID-19 PRODUCT INSERT. In. Rev. 3.1 ed. Abbott Diagnostics  
164 Scarborough, Maine, USA2020.
- 165 9. Poljak M, Korva M, Knap Gasper N, et al. Clinical evaluation of the cobas SARS-CoV-2 test and a  
166 diagnostic platform switch during 48 hours in the midst of the COVID-19 pandemic. *J Clin*  
167 *Microbiol*. 2020.
- 168 10. Real-time-reverse transcription PCR (rRT-PCR) assay for the detection of the current novel  
169 coronavirus (2019-nCoV) at the State Public Health Laboratory [press release]. Hartford, CT:  
170 State of Connecticut Department of Public Health, 2/27/20 2020.
- 171 11. Centers for Disease Control and Prevention (CDC). Symptom-Based Strategy to Discontinue  
172 Isolation for Persons with COVID-19 | CDC. @CDCgov. [https://www.cdc.gov/coronavirus/2019-](https://www.cdc.gov/coronavirus/2019-ncov/community/strategy-discontinue-isolation.html?deliveryName=USCDC_2067-DM27395)  
173 [ncov/community/strategy-discontinue-isolation.html?deliveryName=USCDC\\_2067-DM27395](https://www.cdc.gov/coronavirus/2019-ncov/community/strategy-discontinue-isolation.html?deliveryName=USCDC_2067-DM27395).  
174 Published 2020. Updated 2020-05-03T05:34:11Z. Accessed 05 May 2020.
- 175 12. Centers for Disease Control and Prevention (CDC). Disposition of Non-Hospitalized Patients with  
176 COVID-19 | CDC. Centers for Disease Control and Prevention (CDC), CDC.gov.  
177 <https://www.cdc.gov/coronavirus/2019-ncov/hcp/disposition-in-home-patients.html>. Published  
178 2020. Updated 2020-05-03T03:00:18Z. Accessed 06 May 2020.
- 179 13. World Health O. *Laboratory testing for coronavirus disease (COVID-19) in suspected human*  
180 *cases: interim guidance, 19 March 2020*. Geneva: World Health Organization; 2020 2020.
- 181 14. Lai CC, Liu YH, Wang CY, et al. Asymptomatic carrier state, acute respiratory disease, and  
182 pneumonia due to severe acute respiratory syndrome coronavirus 2 (SARS-CoV-2): Facts and  
183 myths. *J Microbiol Immunol Infect*. 2020.
- 184 15. Wolfel R, Corman VM, Guggemos W, et al. Virological assessment of hospitalized patients with  
185 COVID-2019. *Nature*. 2020.
- 186 16. Xiao AT, Tong YX, Zhang S. Profile of RT-PCR for SARS-CoV-2: a preliminary study from 56 COVID-  
187 19 patients. *Clin Infect Dis*. 2020.
- 188 17. Christian MD, Poutanen SM, Loutfy MR, Muller MP, Low DE. Severe acute respiratory syndrome.  
189 *Clin Infect Dis*. 2004;38(10):1420-1427.

190



**Figure 1: Repeated tests necessary for change in SARS-CoV-2 detected status**

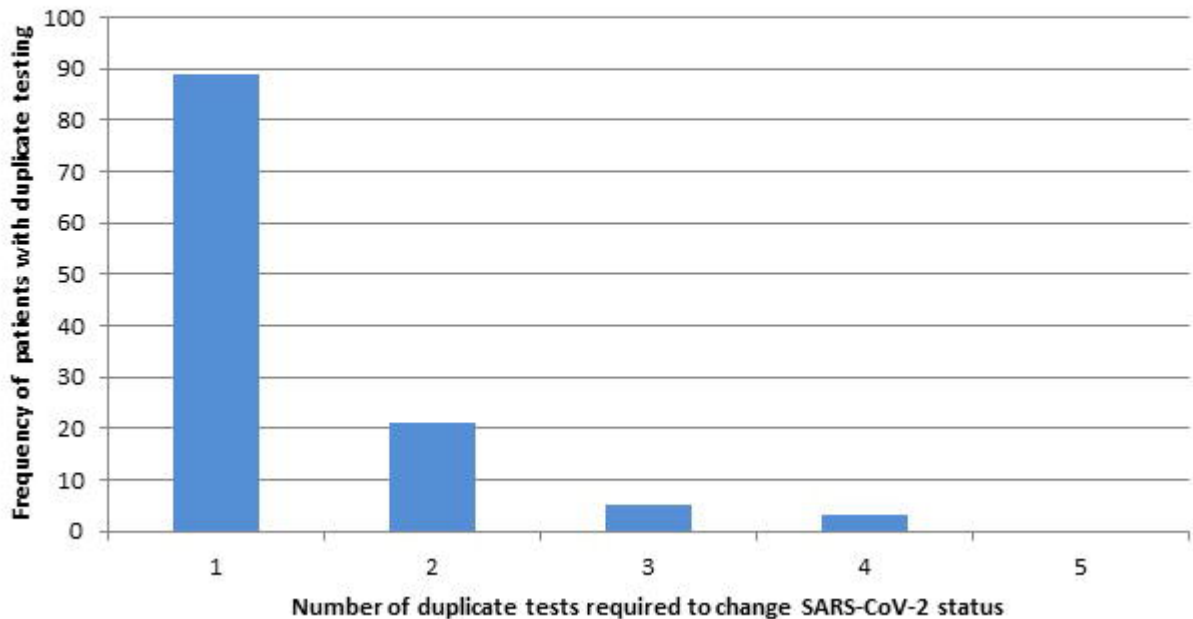

Figure 2: Days between progression (switch from negative to positive SARS-CoV-2 test results). Box shows interquartile range and median.

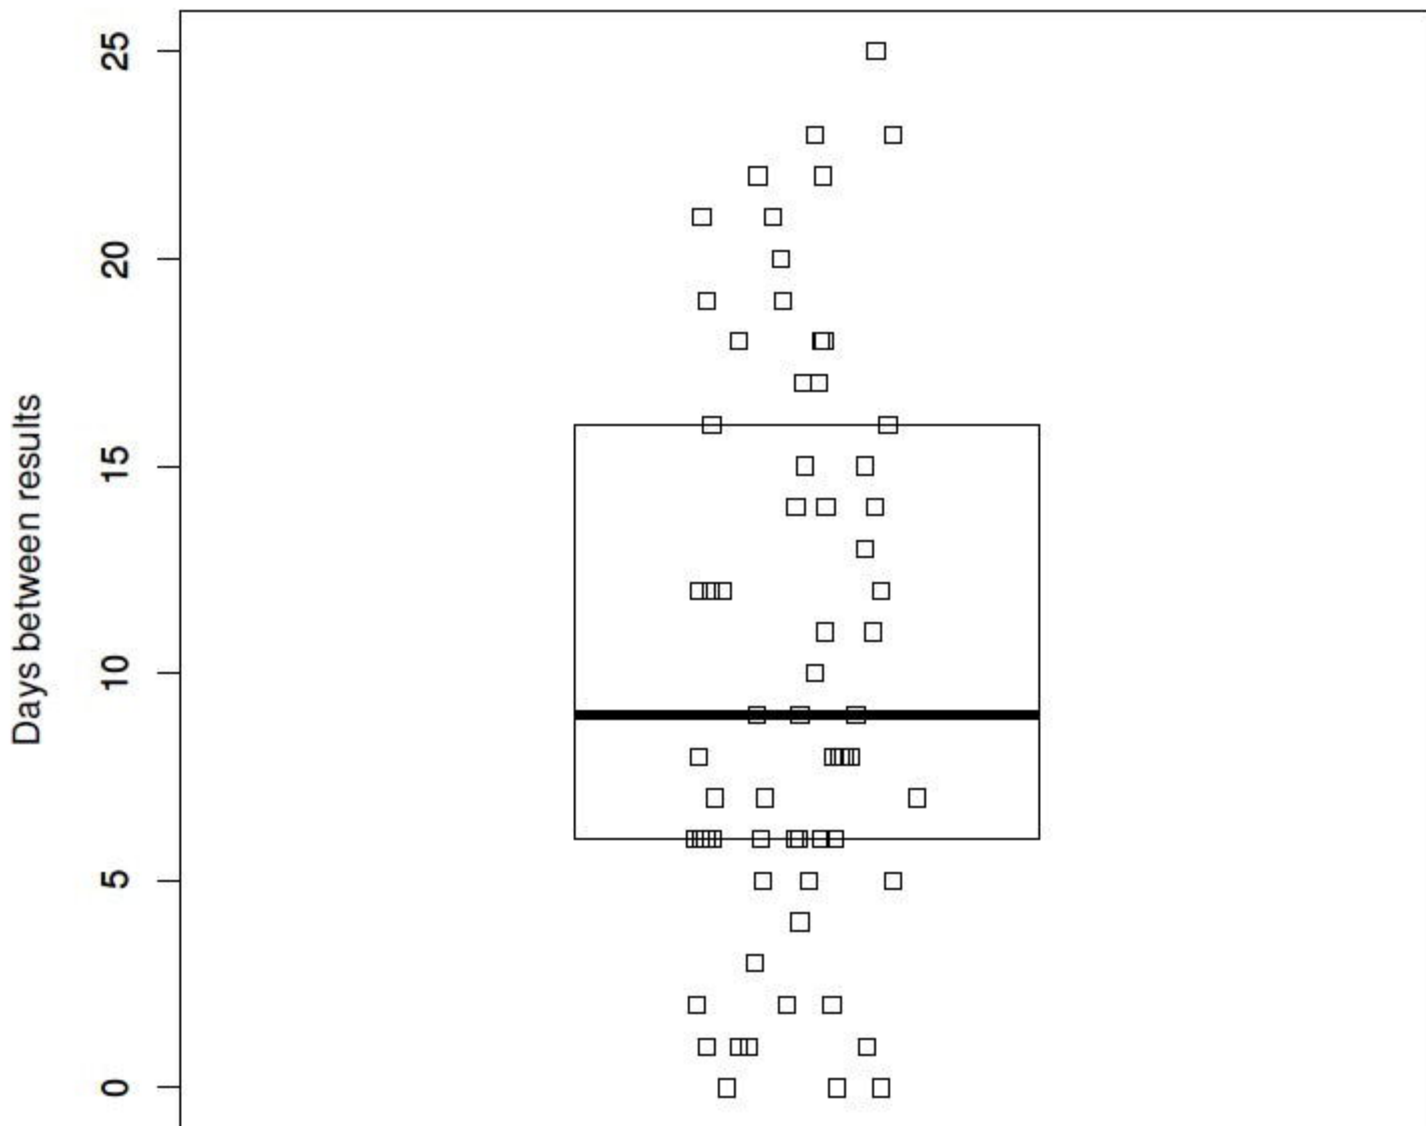

Patients with Negative to Positive SARS-CoV-2 NAA Results

Figure 3: Days between remission (switch from positive to negative SARS-CoV-2 results). Box shows interquartile range and median.

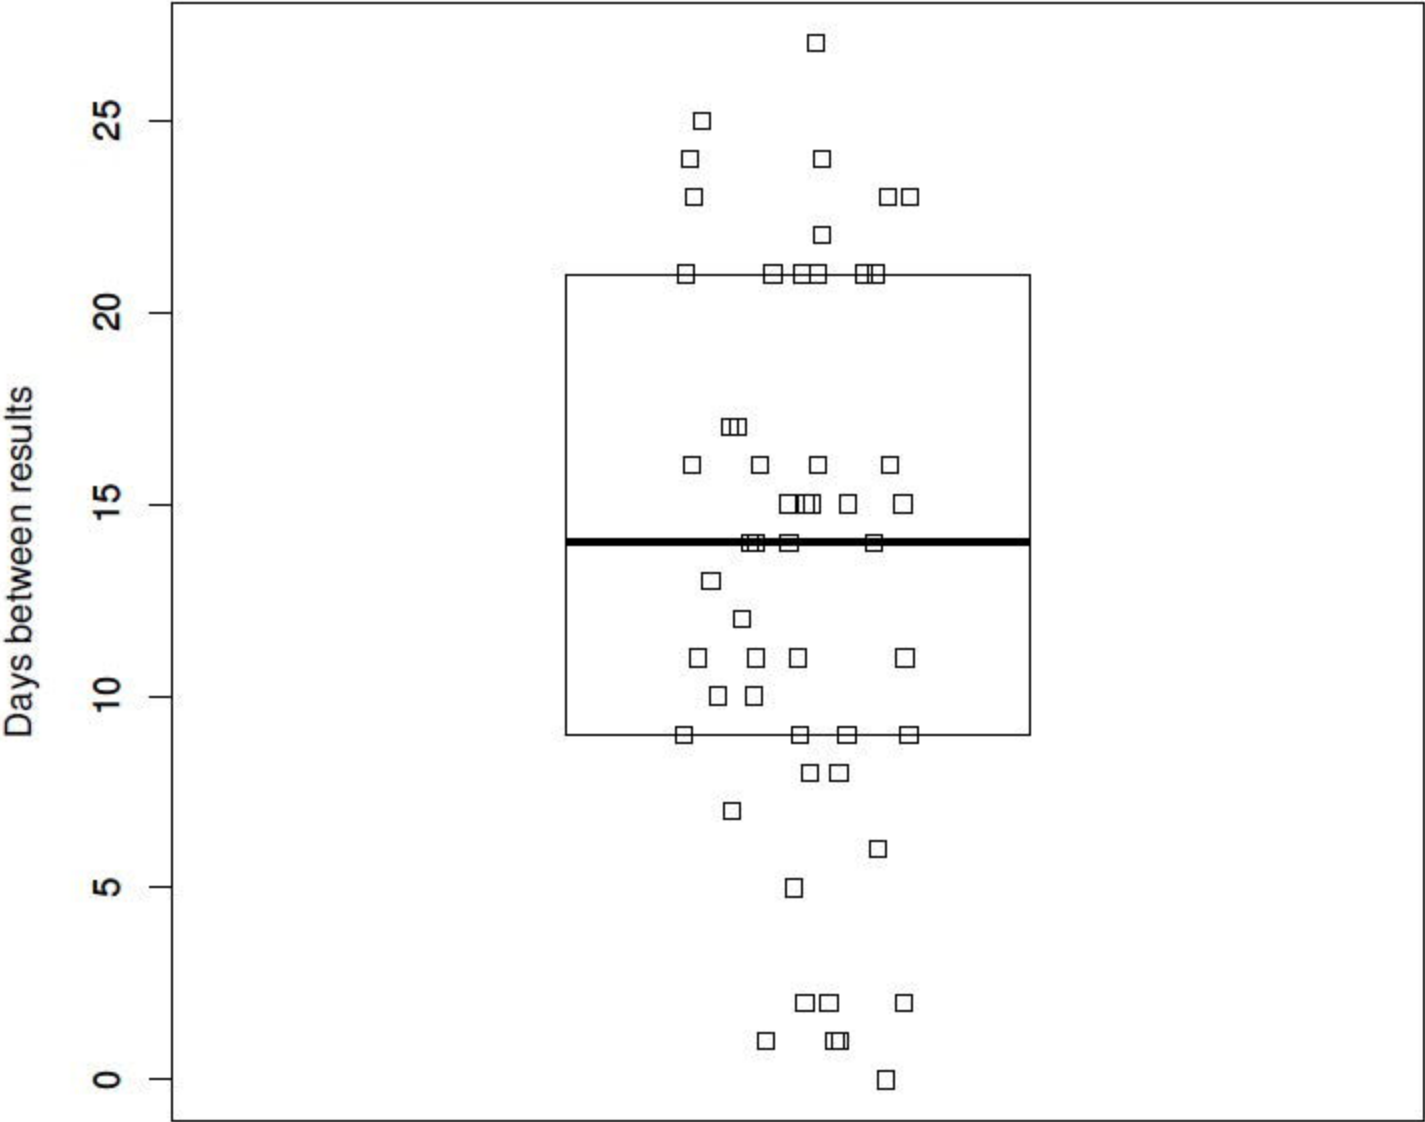

Patients with Positive to Negative SARS-CoV-2 NAA Results
